# Supplementary material
Source: publisher figshare collection journal article supplement (https://karger.figshare.com/ndownloader/files/25745099)
Supplement: Supplementary file 1 [file 25745099]

**Nach meinem individuellen Experiment…**

1.) Was ist während meines Experimentes passiert (in eigenen Worten)?

2.) Checkliste für meine mittelmäßig und sehr überzeugenden Merkmale (von dem Arbeitsblatt „Vor meinem individuellen Experiment…“):

| Merkmale: | Erfüllt: | Nicht erfüllt: |
| --- | --- | --- |
|  |  |  |
|  |  |  |
|  |  |  |
|  |  |  |
|  |  |  |

Summe: ___ ___

3.) Weitere positive Erfahrungen, die ich im Verhaltensexperiment gemacht habe:

|  |
| --- |
|  |
|  |

4.) Fazit: Was habe ich in diesem Verhaltensexperiment gelernt (in eigenen Worten)?

5.) Wie überzeugt bin ich nach dem Experiment von meiner ursprünglichen Erwartung (0-100)?

6.) Wenn sich die Überzeugung der Erwartung verändert hat, wie könnte eine neue alternative Erwartung basierend auf den Erfahrungen aus dem Verhaltensexperiment lauten (Überzeugung 0-100):
